# Supplementary material for: Phenotypic Characterization of Creole Cattle in the Andean Highlands Using Bio-Morphometric Measures and Zoometric Indices
Source: MDPI journal article supplement (doi:10.3390/ani13111843), 2023-06-01
Supplement: s1 [file s1]

Table S1. Pearson's (r) correlation indices between different bio-morphometric parameters in Creole cattle from the Andean highlands.

|                        | Head length (HL) | Head width (HW) | Head depth (HD) | Height at Withers (HW) | Total length (TL) | Body length (BL) | Thoracic perimeter (TP) | Shank perimeter (SP) | Abdom. perimeter (AP) | Thor. width (TW) | Thor. depth (TD) | Thor. length (ThL) | Rump width (RW) | Rump length (RL) | Rump height (RH) | Ischium width (IW) | Neck length (NL) |
|------------------------|------------------|-----------------|-----------------|------------------------|-------------------|------------------|-------------------------|----------------------|-----------------------|------------------|------------------|--------------------|-----------------|------------------|------------------|--------------------|------------------|
| Head length (HL)       | —                |                 |                 |                        |                   |                  |                         |                      |                       |                  |                  |                    |                 |                  |                  |                    |                  |
| Head width (HW)        | 0.15             | —               |                 |                        |                   |                  |                         |                      |                       |                  |                  |                    |                 |                  |                  |                    |                  |
| Head depth (HD)        | 0.13             | 0.03            | —               |                        |                   |                  |                         |                      |                       |                  |                  |                    |                 |                  |                  |                    |                  |
| Height at Withers (WH) | 0.37***          | -0.04           | 0.28**          | —                      |                   |                  |                         |                      |                       |                  |                  |                    |                 |                  |                  |                    |                  |
| Total length (TL)      | 0.33**           | 0.08            | -0.05           | 0.39***                | —                 |                  |                         |                      |                       |                  |                  |                    |                 |                  |                  |                    |                  |
| Body length (BL)       | 0.24*            | 0.09            | -0.18           | 0.25*                  | 0.50***           | —                |                         |                      |                       |                  |                  |                    |                 |                  |                  |                    |                  |
| Thorac. perimeter (TP) | 0.29**           | -0.16           | -0.01           | 0.24                   | 0.34***           | 0.42***          | —                       |                      |                       |                  |                  |                    |                 |                  |                  |                    |                  |
| Shank perimeter (SP)   | 0.21             | 0.08            | 0.05            | 0.30***                | 0.34***           | 0.28**           | 0.31**                  | —                    |                       |                  |                  |                    |                 |                  |                  |                    |                  |
| Abdom. perimeter (AP)  | 0.41***          | -0.12           | 0.02            | 0.35***                | 0.45***           | 0.40***          | 0.70***                 | 0.36***              | —                     |                  |                  |                    |                 |                  |                  |                    |                  |
| Thoracic width (TW)    | 0.13             | 0.08            | 0.22*           | 0.40***                | 0.16              | 0.02             | 0.09                    | 0.19                 | 0.21                  | —                |                  |                    |                 |                  |                  |                    |                  |
| Thoracic depth (TD)    | 0.25*            | 0.06            | 0.13            | 0.29**                 | 0.30**            | 0.26**           | 0.32**                  | 0.20                 | 0.45***               | 0.40***          | —                |                    |                 |                  |                  |                    |                  |
| Thoracic length (ThL)  | 0.09             | 0.07            | -0.32**         | -0.05                  | 0.15              | 0.24**           | 0.08                    | 0.01                 | 0.10                  | -0.15            | 0.29**           | —                  |                 |                  |                  |                    |                  |
| Rump width (RW)        | 0.33**           | 0.05            | 0.10            | 0.38***                | 0.29**            | 0.28**           | 0.43***                 | 0.34***              | 0.39***               | 0.44***          | 0.43***          | 0.08               | —               |                  |                  |                    |                  |
| Rump length (RL)       | 0.42***          | 0.09            | 0.16            | 0.53***                | 0.46***           | 0.40***          | 0.45***                 | 0.33**               | 0.47***               | 0.46***          | 0.45***          | 0.00               | 0.68***         | —                |                  |                    |                  |
| Rump height (RH)       | -0.01            | 0.04            | -0.04           | 0.15                   | 0.03              | -0.02            | 0.11                    | 0.07                 | 0.13                  | 0.32**           | 0.10             | 0.04               | 0.16            | 0.11             | —                |                    |                  |
| Ischium width (IW)     | 0.20             | -0.02           | 0.33**          | 0.24*                  | 0.03              | 0.01             | 0.19                    | 0.25*                | 0.16                  | 0.22*            | 0.20             | -0.23*             | 0.31**          | 0.26**           | -0.02            | —                  |                  |
| Neck length (NL)       | -0.04            | 0.17            | 0.26**          | 0.23*                  | 0.03              | 0.16             | -0.09                   | 0.14                 | 0.01                  | 0.39***          | 0.12             | -0.11              | 0.09            | 0.07             | 0.07             | 0.23*              | —                |

Significance between parameters was shown as \* ( $p \leq 0.05$ ), \*\* ( $p \leq 0.01$ ), and \*\*\* ( $p \leq 0.001$ ).
